# Supplementary material for: Clustering of Expression Data in Chronic Lymphocytic Leukemia Reveals New Molecular Subdivisions
Source: PubMed Central journal article supplement (PMC4565688; doi:10.1371/journal.pone.0137132), 2015-09-10
Supplement: pone.0137132.s001.pdf [file pone.0137132.s001.pdf]

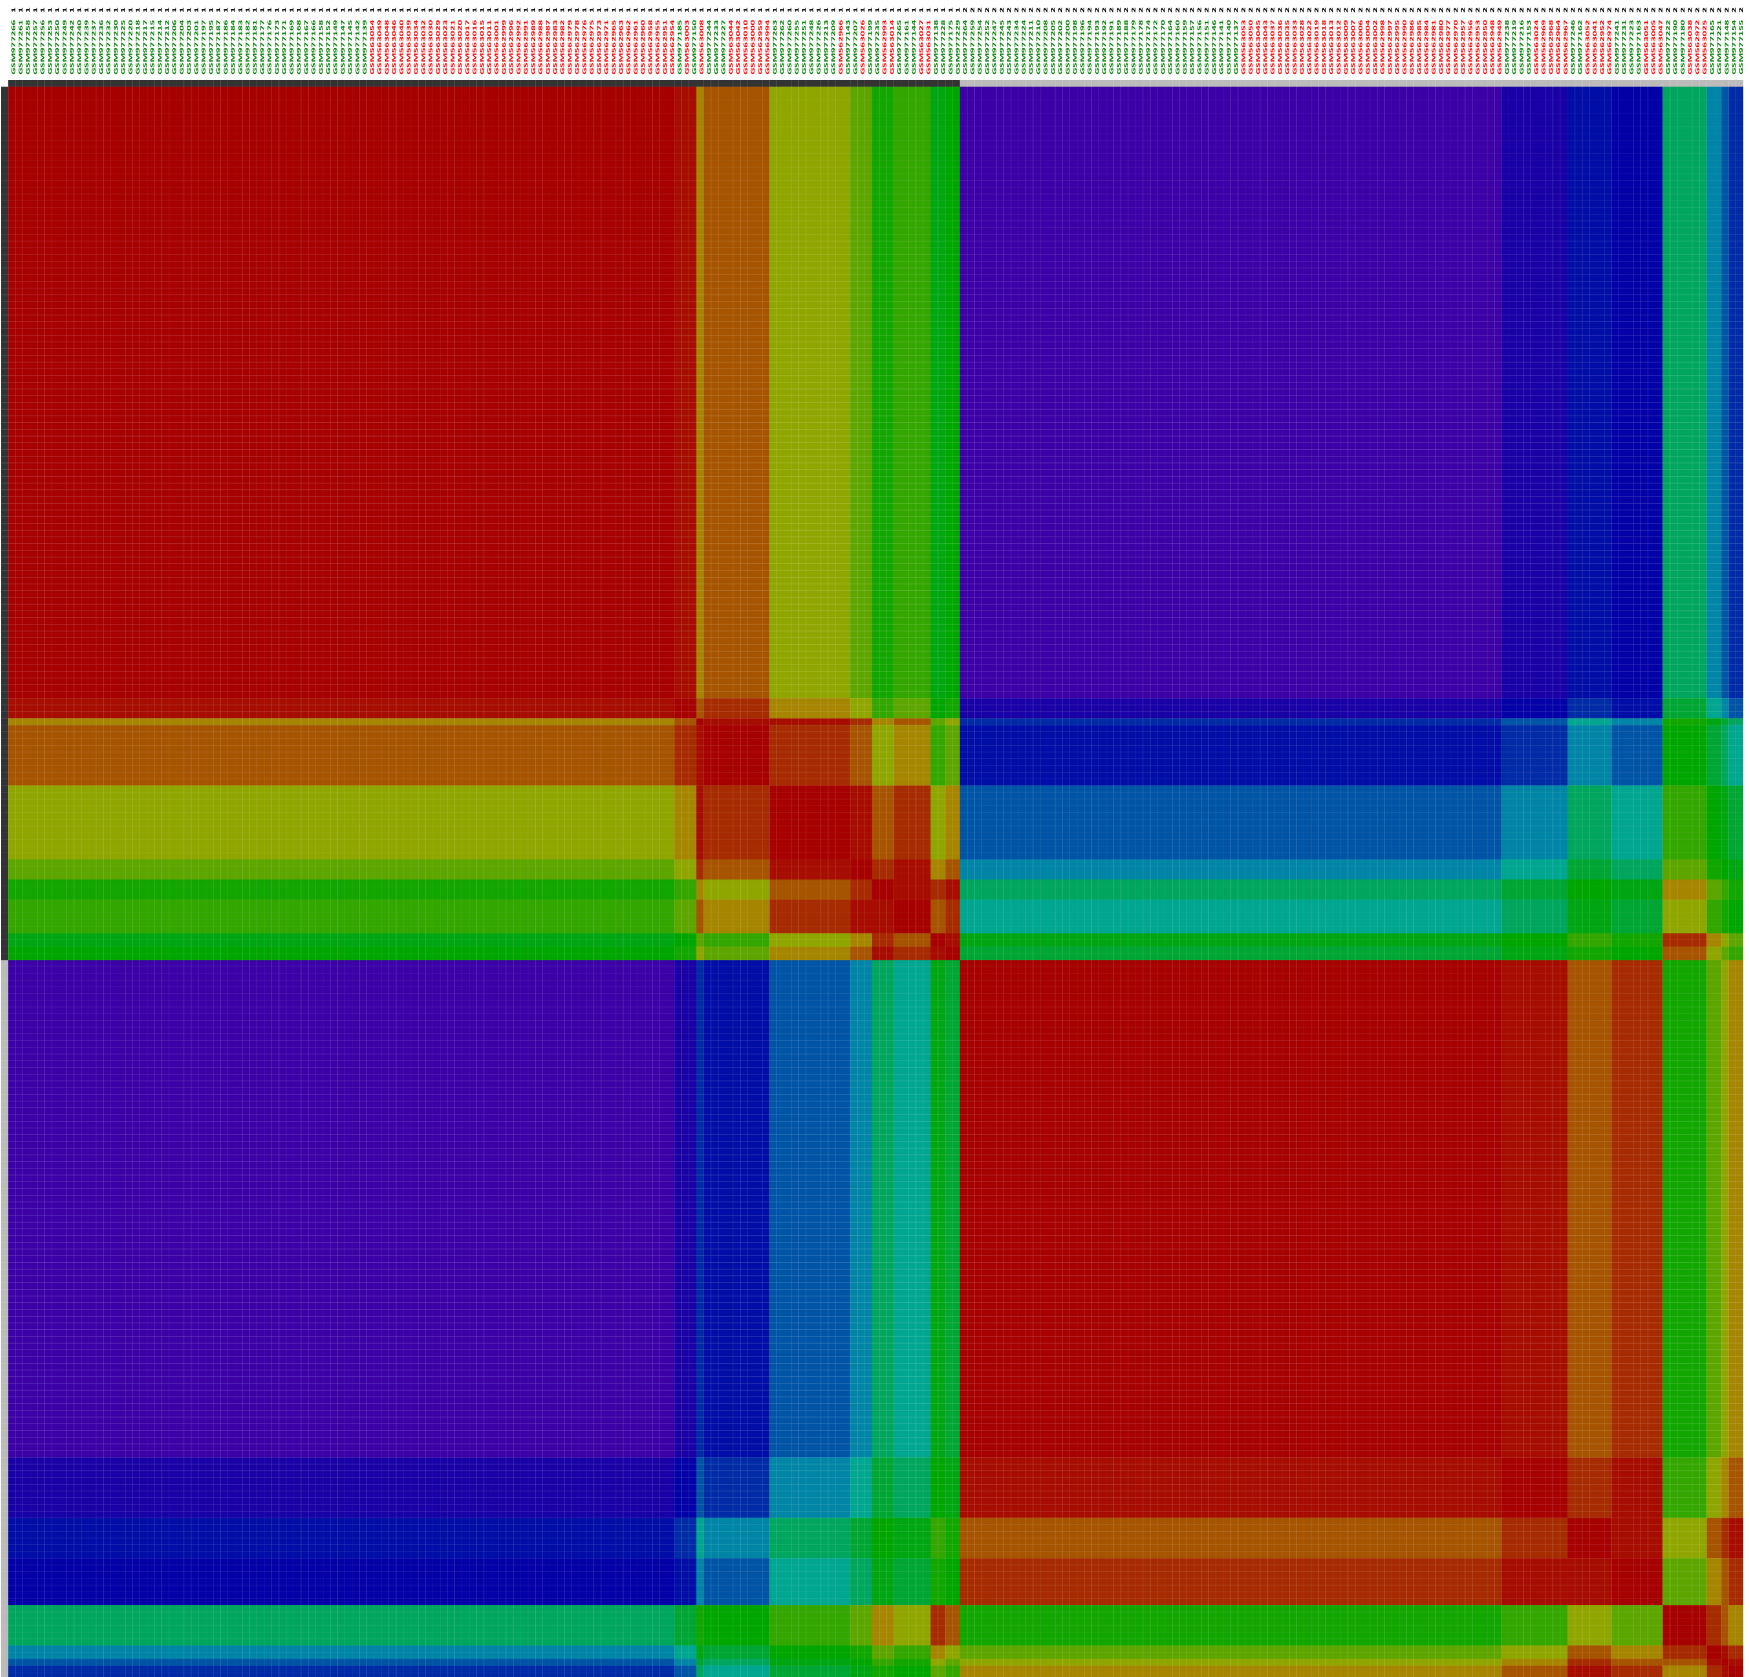

**Cohorts:**  
**GSE39671**  
**GSE22762**
